# Supplementary material
Source: publisher figshare collection journal article supplement (https://acs.figshare.com/ndownloader/files/31538324)
Supplement: Supplementary file 1 [file 31538324]

# Supporting Information

## Microscale Curling and Aligning of $\text{Ti}_3\text{C}_2\text{T}_x$ MXene by Confining Aerosol Droplets for Planar Micro-supercapacitors

*Yu Wu,<sup>†,‡,§</sup> Danjiao Zhao,<sup>†,‡,§</sup> Jidi Zhang,<sup>⊥</sup> Aiping Lin,<sup>†,‡</sup> Yu Wang,<sup>†,‡</sup> Lei Cao,<sup>†,‡</sup> Shufen Wang,<sup>†,‡</sup> Shixian Xiong,<sup>\*,†,‡</sup> and Feng Gu<sup>\*,†,‡,⊥</sup>*

<sup>†</sup>Jiangxi University of Science and Technology, Ganzhou 341000, China

<sup>‡</sup>Laboratory of Advanced Materials & Manufacturing (LAMM), Jiangxi Provincial Key Laboratory for Simulation and Modelling of Particulate Systems, Jiangxi University of Science and Technology, Nanchang 330013, China

<sup>⊥</sup> Institute for Process Modelling and Optimization, Jiangsu Industrial Technology Research Institute, Suzhou 215123, China

<sup>§</sup> Y. Wu and D.J. Zhao contributed equally to this work.

### Corresponding Author

**Feng Gu** — Jiangxi University of Science and Technology, Ganzhou 341000, China; Laboratory of Advanced Materials & Manufacturing (LAMM), Jiangxi Provincial Key Laboratory for Simulation and Modelling of Particulate Systems, Jiangxi University of Science and Technology, Nanchang 330013, China.

E-mail: [feng.gu@jxust.edu.cn](mailto:feng.gu@jxust.edu.cn)

## Authors

Yu Wu — Jiangxi University of Science and Technology, Ganzhou 341000, China;  
Laboratory of Advanced Materials & Manufacturing (LAMM), Jiangxi Provincial Key  
Laboratory for Simulation and Modelling of Particulate Systems, Jiangxi University of  
Science and Technology, Nanchang 330013, China.

E-mail: wuyu\_ah@163.com

Danjiao Zhao — Jiangxi University of Science and Technology, Ganzhou 341000,  
China; Laboratory of Advanced Materials & Manufacturing (LAMM), Jiangxi  
Provincial Key Laboratory for Simulation and Modelling of Particulate Systems,  
Jiangxi University of Science and Technology, Nanchang 330013, China.

E-mail: jjzhaodamm@163.com

Jidi Zhang — Institute for Process Modelling and Optimization, Jiangsu Industrial  
Technology Research Institute, Suzhou 215123, China.

E-mail: jidi.zhang@simpas.cn

Aiping Lin — Jiangxi University of Science and Technology, Ganzhou 341000, China;  
Laboratory of Advanced Materials & Manufacturing (LAMM), Jiangxi Provincial Key  
Laboratory for Simulation and Modelling of Particulate Systems, Jiangxi University of  
Science and Technology, Nanchang 330013, China.

E-mail: linaipinga@163.com

Yu Wang — Jiangxi University of Science and Technology, Ganzhou 341000, China;  
Laboratory of Advanced Materials & Manufacturing (LAMM), Jiangxi Provincial Key

Laboratory for Simulation and Modelling of Particulate Systems, Jiangxi University of Science and Technology, Nanchang 330013, China.

E-mail: wangyuysu@163.com

Lei Cao — Jiangxi University of Science and Technology, Ganzhou 341000, China;  
Laboratory of Advanced Materials & Manufacturing (LAMM), Jiangxi Provincial Key  
Laboratory for Simulation and Modelling of Particulate Systems, Jiangxi University of  
Science and Technology, Nanchang 330013, China.

E-mail: lei.cao@outlook.com

Shufen Wang — Jiangxi University of Science and Technology, Ganzhou 341000,  
China; Laboratory of Advanced Materials & Manufacturing (LAMM), Jiangxi  
Provincial Key Laboratory for Simulation and Modelling of Particulate Systems,  
Jiangxi University of Science and Technology, Nanchang 330013, China.

E-mail: simpaswang@outlook.com

Shixian Xiong — Jiangxi University of Science and Technology, Ganzhou 341000,  
China; Laboratory of Advanced Materials & Manufacturing (LAMM), Jiangxi  
Provincial Key Laboratory for Simulation and Modelling of Particulate Systems,  
Jiangxi University of Science and Technology, Nanchang 330013, China.

E-mail: s.xiong@jxust.edu.cn

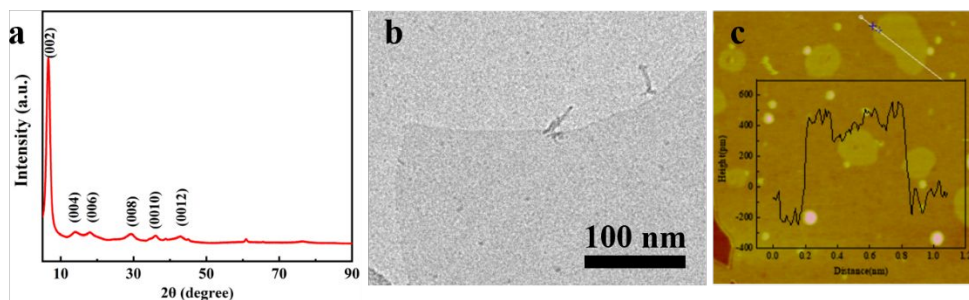

**Figure S1.** XRD pattern (a), TEM (b) and AFM (c) results of the delaminated  $\text{Ti}_3\text{C}_2\text{T}_x$  nanosheets.

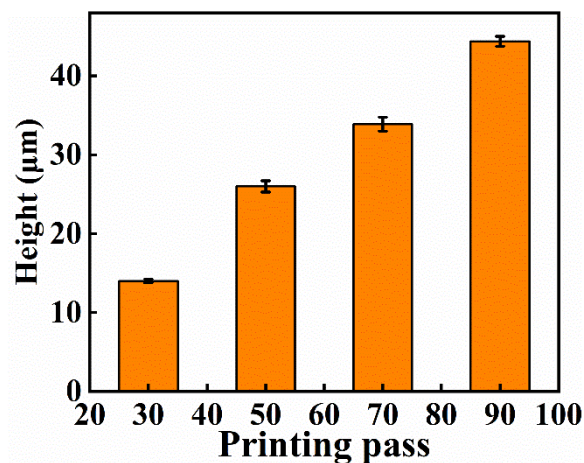

**Figure S2.** The dependence of pattern thickness on printing passes, showing a linear behavior.

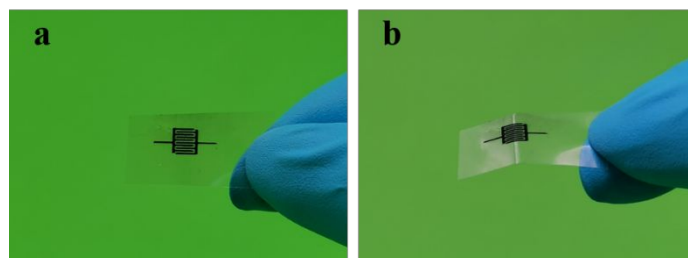

**Figure S3.** Photographs of the printed patterns on PET substrate, showing robust after being folded 100 times. (a) before, (b) after.

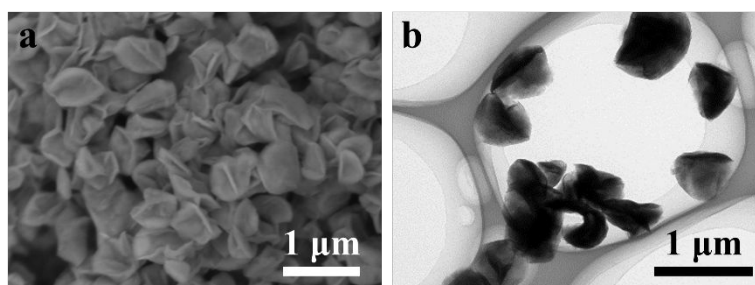

**Figure S4.** MXene crumpled nanospheres obtained by in situ collecting the aerosol droplets out of the nozzle at  $100^\circ\text{C}$ . (a) SEM image, (b) TEM image.

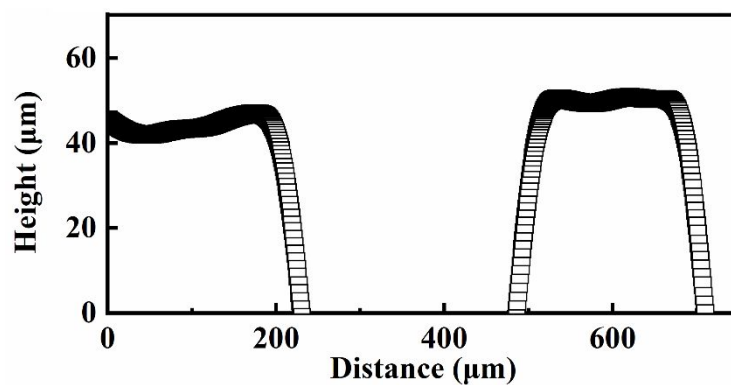

**Figure S5.** The height profile of adjacent patterns showing similar thickness and width.

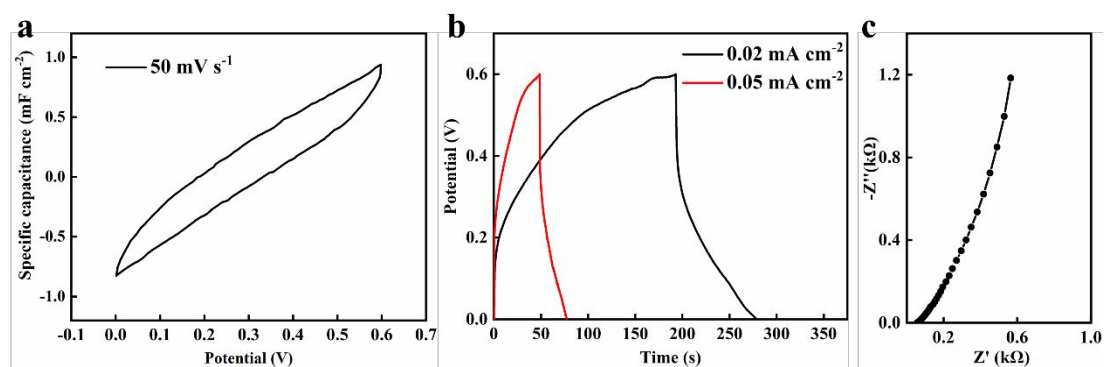

**Figure S6.** CV curve (a), GCD profiles (b) and EIS (c) of the MSC device of MXene via vacuum-assisted filtration process.

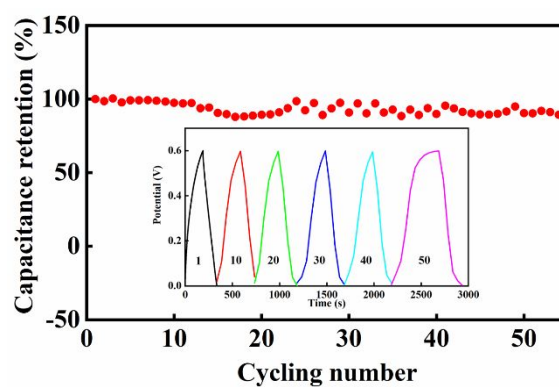

**Figure S7.** Cycling testing of the fabricated MSC device at a current density of  $0.05 \text{ mA cm}^{-2}$ .

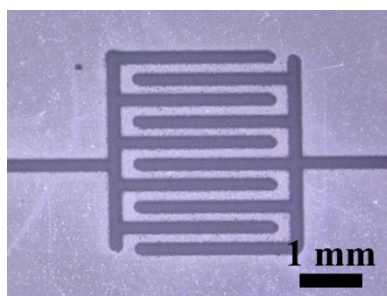

**Figure S8.** Optical image of one interdigital electrode with the gap distance of 170  $\mu\text{m}$ .

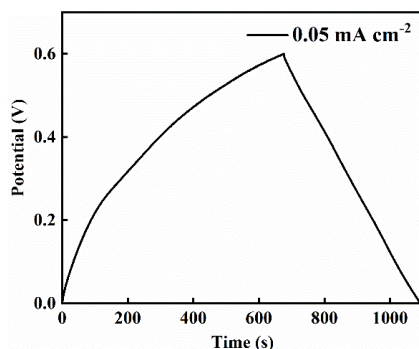

**Figure S9.** GCD profile of the MSC device with interdigital electrode (line width of 250  $\mu\text{m}$ , gap distance of 170  $\mu\text{m}$  and printing pass of 50) at a current density of 0.05  $\text{mA cm}^{-2}$ .

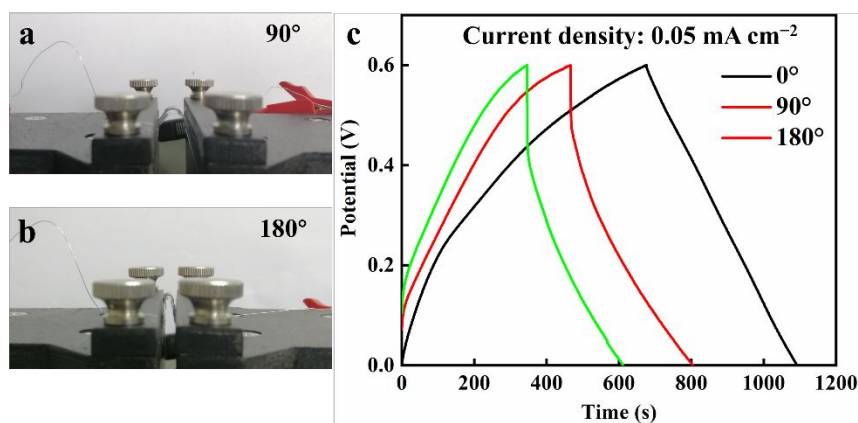

**Figure S10.** (a, b) MSC devices bent at 90° and 180° and the corresponding GCD profiles was given in (c).

**Supplementary Table 1.** Areal capacitance comparison of various MSCs.

| Material               | Additive manufacturing method | Areal capacitance ( $\text{mF cm}^{-2}$ ) | Reference |
|------------------------|-------------------------------|-------------------------------------------|-----------|
| PEDOT/MnO <sub>2</sub> | Inkjet printing               | 0.26                                      | 1         |
| Graphene               | Inkjet printing               | 0.7                                       | 2         |
| Graphene/MXene         | Spray coating                 | 3.26                                      | 3         |

|                                                 |                      |       |           |
|-------------------------------------------------|----------------------|-------|-----------|
| <b>Ti<sub>3</sub>C<sub>2</sub>T<sub>x</sub></b> | Direct writing       | 5     | 4         |
| <b>Graphene</b>                                 | Spray coating        | 5.4   | 5         |
| <b>Ti<sub>3</sub>C<sub>2</sub>T<sub>x</sub></b> | Inkjet printing      | 12    | 6         |
| <b>Ti<sub>3</sub>C<sub>2</sub>T<sub>x</sub></b> | Aerosol jet printing | 34.87 | This work |

- (1) Wang, Y.; Zhang, Y.-Z.; Dubbink, D.; Ten Elshof, J. E., Inkjet printing of delta-MnO<sub>2</sub> nanosheets for flexible solid-state micro-supercapacitor. *Nano Energy* **2018**, *49*, 481-488.
- (2) Li, J. T.; Delekta, S. S.; Zhang, P. P.; Yang, S.; Lohe, M. R.; Zhuang, X. D.; Feng, X. L.; Ostling, M., Scalable Fabrication and Integration of Graphene Microsupercapacitors through Full Inkjet Printing. *ACS Nano* **2017**, *11* (8), 8249-8256.
- (3) Li, H.; Hou, Y.; Wang, F.; Lohe, M. R.; Zhuang, X.; Niu, L.; Feng, X., Flexible All-Solid-State Supercapacitors with High Volumetric Capacitances Boosted by Solution Processable MXene and Electrochemically Exfoliated Graphene. *Adv. Energy Mater.* **2017**, *7* (4), 1601847.
- (4) Quain, E.; Mathis, T. S.; Kurra, N.; Maleski, K.; Van Aken, K. L.; Alhabeab, M.; Alshareef, H. N.; Gogotsi, Y., Direct Writing of Additive-Free MXene-in-Water Ink for Electronics and Energy Storage. *Adv. Mater. Technol.* **2019**, *4* (1), 7.
- (5) Liu, Z. Y.; Wu, Z. S.; Yang, S.; Dong, R. H.; Feng, X. L.; Mullen, K., Ultraflexible In-Plane Micro-Supercapacitors by Direct Printing of Solution-Processable Electrochemically Exfoliated Graphene. *Adv. Mater.* **2016**, *28* (11), 2217-2222.
- (6) Zhang, C. F.; McKeon, L.; Kremer, M. P.; Park, S. H.; Ronan, O.; Seral-Ascaso, A.; Barwich, S.; Coileain, C. O.; McEvoy, N.; Nerl, H. C.; Anasori, B.; Coleman, J. N.; Gogotsi, Y.; Nicolosi, V., Additive-free MXene inks and direct printing of micro-supercapacitors. *Nat. Commun.* **2019**, *10*, 9.
